RESEARCH ARTICLE

# Interspecific Phylogenetic Relationships within Genus *Melilotus* Based on Nuclear and Chloroplast DNA

Hongyan Di<sup>1,2</sup>, Zhen Duan<sup>1,2</sup>, Kai Luo<sup>1,2</sup>, Daiyu Zhang<sup>1,2</sup>, Fan Wu<sup>1,2</sup>, Jiyu Zhang<sup>1,2\*</sup>, Wenxian Liu<sup>1,2</sup>, Yanrong Wang<sup>1,2</sup>

**1** State Key Laboratory of Grassland Agro-ecosystems, College of Pastoral Agriculture Science and Technology, Lanzhou University, Lanzhou City, China, **2** College of Pastoral Agriculture Science and Technology, Lanzhou University, Lanzhou City, China

\* [zhangjy@lzu.edu.cn](mailto:zhangjy@lzu.edu.cn)

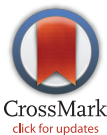

**OPEN ACCESS**

**Citation:** Di H, Duan Z, Luo K, Zhang D, Wu F, Zhang J, et al. (2015) Interspecific Phylogenetic Relationships within Genus *Melilotus* Based on Nuclear and Chloroplast DNA. PLoS ONE 10(7): e0132596. doi:10.1371/journal.pone.0132596

**Editor:** Genlou Sun, Saint Mary's University, CANADA

**Received:** December 8, 2014

**Accepted:** June 16, 2015

**Published:** July 13, 2015

**Copyright:** © 2015 Di et al. This is an open access article distributed under the terms of the [Creative Commons Attribution License](https://creativecommons.org/licenses/by/4.0/), which permits unrestricted use, distribution, and reproduction in any medium, provided the original author and source are credited.

**Data Availability Statement:** All relevant data are within the paper.

**Funding:** This research was supported by grants from Ministry of Agriculture, China (20120304205), Ministry of S&T, China (31101759), the Department of Agriculture and Animal Husbandry, Gansu province (GNSW-2011-16).

**Competing Interests:** The authors have declared that no competing interests exist.

## Abstract

*Melilotus* comprises 19 species, while the phylogenetic relationships between species remain unclear. In the present work, three chloroplast genes, *rbcL*, *matK*, *trnL-F*, and one nuclear region, ITS (internal transcribed spacer) belonging to 48 populations of 18 species of *Melilotus* were sequenced and phylogenetic trees were constructed to study their interspecific relationships. Based on the phylogenetic tree generated in this study using *rbcL* analysis, the *Melilotus* genus is clearly monophyletic in the legume family. Both Bayesian and maximum-parsimony approaches were used to analyze the data. The nrDNA ITS provided more informative characteristics (9.8%) than cpDNA (3.0%). *Melilotus* contains two closely related groups, clade I and clade II. *M. spicatus*, *M. indicus* and *M. segetalis* have a close relationship. *M. infestus*, *M. siculus* and *M. sulcatus* are closely related. The comparing between molecular phylogeny and flower color classification in *Melilotus* showed that the flower color is not much informative for phylogenetics of this genus.

## Introduction

*Melilotus* (sweet clover) belongs to the tribe Trifolieae of the legume family and comprises 19 annual and biennial species [1]. All species are native to Eurasia or North Africa [2], and three species are cultivated: *M. albus*, *M. officinalis* and *M. indicus* [3]. *M. albus* and *M. officinalis* are mainly capable of self-pollination [4], but when the pistil is longer than the stamens, there is very little self-pollination [5]. *Melilotus* also has entomophilous flowers, which can lead to hybridization. Several species have invaded the Northwest Territories in Canada and the Mid-western USA, among which *M. albus* and *M. officinalis* are often studied [6, 7, 8]. Members of the *Melilotus* genus have high seed yields and, relative to most other forages, are more tolerant to extremes in environmental conditions, e.g. drought, cold and high salinity [9, 10]. *Melilotus* also has important medicinal value in addition to being an important forage crop [11].

Furthermore, the nitrogen fixation rate of *Melilotus* is higher than that of other legumes, making it beneficial for crop rotations [12].

Members of *Melilotus* exhibit wide variations in flower structure, flower color, seed, leaf and pod characteristics [13, 14]. The classification of *Melilotus* are more difficult based on morphological traits and growth habits [15, 16]. However, except for morphological studies, no other taxonomic assessments have been conducted on interspecific phylogenetic relationships among species. Analysis of DNA has been widely used in the phylogenetic and classification studies. These methods are more effective and specific than traditionally morphological methods in phylogenetic relationships and genetic variation involved in sibling species and morphologically intermediate species [17, 18].

Phylogenetic results that used a single gene may lead to misleading, especially in cpDNA, which is inherited maternally [19]. Hybridization between different species or genera may lead to reticulate evolution [20]. The employment of a different molecular marker could help to assess and to reduce this problem. Nuclear ribosomal genes with alternating gene and spacer regions and tandem repeat structures can provide this option [21, 22, 23]. The nrDNA internal transcribed spacer (ITS) region and chloroplast DNA have higher variability and are thus suitable for classifying lower taxonomic levels [24, 25, 26]. Accordingly, these regions are useful for inferring phylogenetic relationships at lower taxonomic levels and have been successfully used to analyze plant systematics [27, 28]. Here we selected three cpDNA termed the *rbcL* gene, *matK* gene and *trnL-F* gene and one nrDNA ITS to study the interspecific relationships [29, 30].

In this study, except for *M. macrocarpus* in *Melilotus* genus, plant samples from 48 populations of 18 *Melilotus* species were collected. To study the phylogenetic relationships among members of the *Melilotus* genus and to generate more accurate estimates of its genetic diversity, we constructed the molecular phylogenetic trees of single nrDNA ITS, 3-cpDNA and the concatenated sequences of all four genes. Finally the molecular phylogenetic classification was compared based on flower color and karyotype in *Melilotus*.

## Materials and Methods

### Sampling

Seeds from 48 populations representing 18 species were obtained from National Plant Germplasm System (NPGS, America) and planted at Yuzhong (35°57'N, 104°09'E) in Gansu Province, China (Table 1). Samples were collected from public land instead of protected areas in the northwest China, and no samples of endangered or protected species were included in our study.

Young leaves from 2 to 12 individuals of each population were sampled (totaling 406 individuals). Leaves were frozen in liquid nitrogen and stored at -80°C.

### DNA extraction, amplification and sequencing

Four genes were amplified and sequenced: three chloroplast genes (cpDNA), *trnL-F*, *rbcL* and *matK*, and one nuclear region (nrDNA), ITS (Table 2). For each population, 2 to 12 independent DNA samples were obtained to check for sequencing errors. Total genomic DNA was extracted using an SDS (sodium dodecyl sulfate) method [31]. Polymerase chain reactions were then conducted in a 25- $\mu$ L tube containing 1  $\mu$ L genomic DNA (50 ng / mL), 1  $\mu$ L of each primer (5 pmol / mL), 12.5  $\mu$ L Takara Taq DNA polymerase master mix and 9.5  $\mu$ L deionized water. For nuclear DNA ITS, the region was amplified using a PCR protocol of 94°C for 3 min, followed by 35 cycles of denaturation at 94°C for 30 s, annealing at 50°C for 30 s, and extension at 72°C for 1 min, and a final extension at 72°C for 10 min. For *trnL-F* gene using a PCR

Table 1. Information for 48 populations of 18 *Melilotus* species.

| Species               | Population number | Origin                      | Latitude | Longitude |
|-----------------------|-------------------|-----------------------------|----------|-----------|
| <i>M. albus</i>       | PI 90557          | China, Manchuria            | 45°19'   | 124°29'   |
|                       | Ames 21597        | Italy                       | 41°52'   | 12°34'    |
| <i>M. altissimus</i>  | Ames 18376        | United States, Nebraska     | 41°29'   | -99°54'   |
|                       | PI 275975         | -                           | -        | -         |
|                       | PI 420163         | France                      | 46°13'   | -2°12'    |
| <i>M. dentatus</i>    | PI 108656         | Armenia                     | 40°4'    | -45°2'    |
|                       | PI 90753          | China                       | 35°51'   | -104°11'  |
| <i>M. elegans</i>     | PI 250873         | Iran                        | 32°25'   | -53°41'   |
|                       | PI 260271         | Ethiopia, Shewa             | 9°9'     | -37°48'   |
| <i>M. hirsutus</i>    | Ames 22882        | Russian Federation          | 61°31'   | 105°19'   |
|                       | PI 129697         | Sweden                      | 60°7'    | -18°38'   |
| <i>M. indicus</i>     | Ames 24055        | Egypt                       | 26°49'   | 30°48'    |
|                       | PI 107562         | Uzbekistan                  | 41°22'   | 64°35'    |
|                       | PI 260756         | Turkey                      | 38°57'   | 35°14'    |
|                       | PI 43595          | -                           | -        | -         |
|                       | Ames 21619        | United States, Nebraska     | 41°29'   | -99°54'   |
| <i>M. infestus</i>    | PI 308524         | Peru                        | -9°11'   | -75°0'    |
|                       | PI 306327         | Italy                       | 41°52'   | 12°34'    |
|                       | PI 306328         | Hungary                     | 47°9'    | 19°30'    |
|                       | PI 306326         | Algeria                     | 27°13'   | 2°29'     |
| <i>M. italicus</i>    | PI 317638         | Israel                      | 31°2'    | 34°51'    |
|                       | PI 317635         | Czechoslovakia              | 14°28'   | 121°2'    |
| <i>M. officinalis</i> | PI 304530         | Turkey                      | 38°57'   | -35°14'   |
| <i>M. polonicus</i>   | PI 314386         | Former Soviet Union         | 24°47'   | 120°60'   |
|                       | PI 108647         | Former Soviet Union         | 24°47'   | 120°60'   |
| <i>M. segetalis</i>   | PI 317633         | Algeria                     | 27°13'   | 2°29'     |
|                       | PI 43597          | -                           | -        | -         |
|                       | PI 317649         | Czechoslovakia              | 14°28'   | 121°2'    |
| <i>M. siculus</i>     | PI 129703         | Malta                       | 35°56'   | 14°22'    |
|                       | PI 318508         | Greece                      | 39°4'    | 21°49'    |
|                       | PI 33366          | Former Soviet Union         | 24°46'   | 120°59'   |
| <i>M. speciosus</i>   | PI 317650         | Canada, Manitoba            | 53°45'   | -98°48'   |
| <i>M. spicatus</i>    | PI 317644         | Algeria                     | 27°13'   | 2°29'     |
|                       | Ames 25647        | Ukraine, Krym               | 44°57'   | 34°6'     |
|                       | Ames 18402        | United States, Nebraska     | 41°29'   | -99°54'   |
|                       | PI 314466         | Uzbekistan                  | 41°22'   | 64°35'    |
| <i>M. suaveolens</i>  | Ames 18444        | United States, Nebraska     | 41°29'   | -99°54'   |
|                       | Ames 23793        | Mongolia                    | 46°51'   | 103°50'   |
|                       | PI 593408         | United States, South Dakota | 43°58'   | -99°54'   |
|                       | PI 595395         | United States, Iowa         | 41°52'   | -93°5'    |
| <i>M. sulcatus</i>    | PI 198090         | Morocco                     | 31°47'   | -7°5'     |
|                       | PI 227595         | Tunisia                     | 33°53'   | -9°32'    |
| <i>M. tauricus</i>    | PI 67510          | Ukraine, Krym               | 44°57'   | 34°6'     |
|                       | Ames 18446        | United States, Nebraska     | 41°29'   | -99°54'   |
|                       | Ames 25789        | Ukraine, Krym               | 44°57'   | 34°6'     |
| <i>M. wolgicus</i>    | PI 317665         | Denmark                     | 56°15'   | 9°30'     |
|                       | PI 502547         | Russian Federation          | 61°31'   | 105°19'   |
|                       | PI 317666         | Czechoslovakia              | 14°28'   | 121°2'    |

doi:10.1371/journal.pone.0132596.t001

**Table 2. Sequences of primers used to amplify genes.**

| Primer           | Sequence                   | Reference |
|------------------|----------------------------|-----------|
| ITS_F            | GGAAGKARAAGTCGTAACAAGG     | -         |
| ITS_R            | RGTTTCTTTTCCTCCGCTTA       | -         |
| <i>rbcL</i> _F   | AGACCTWTTTGAAGAAGGTTCWGT   | [48]      |
| <i>rbcL</i> _R   | TCGGTYAGAGCRGGCATRTGCCA    | [48]      |
| <i>matK</i> _F   | CCCRTYCATCTGGAA ATCTTGGTTC | [49]      |
| <i>matK</i> _R   | GCTRTRATAATGAGAAAGATTCTGC  | [49]      |
| <i>trnL</i> -F_F | CGAAATCGGTAGACGCTACG       | [50]      |
| <i>trnL</i> -F_R | ATTGAACTGGTGACACGAG        | [50]      |

doi:10.1371/journal.pone.0132596.t002

protocol of 94°C for 3 min, then 30 cycles at 94°C for 45 s, annealing at 50°C for 45 s, extension at 72°C for 1min and a final extension step at 72°C for 7 min. The PCR temperature protocol of the *matK* gene was: 94°C for 3 min then 35 cycles of denaturation at 94°C for 45 s, annealing at 58°C for 45 s, extension at 72°C for 1 min and a final extension step at 72°C for 10 min. Finally, for *rbcL* gene the following PCR conditions were used: initial denaturation at 94°C for 3 min, followed by 36 cycles of denaturation at 94°C for 30 s, annealing at 56°C for 30 s, and extension at 72°C for 1 min, and a final extension at 72°C for 10 min. The sequencing reactions were performed by Shanghai Shenggong Biotechnological, Ltd. (Shanghai, China).

To analyze the phylogenetic relationship between *Melilotus* and other Legume forage and confirm the monophyly of genus *Melilotus*, we downloaded the only one available gene *rbcL* for most of legumes close to *Melilotus* from NCBI, including *Medicago*, *Trifolium*, *Caragana*, *Lathyrus* and *Vicia*. These *rbcL* sequences were used to construct a phylogenetic tree together with the sequences of 18 species of *Melilotus* obtained in the present study.

## Phylogenetic analyses

Phylogenetic analyses were performed using Bayesian and maximum-parsimony approaches. Sequence alignment was initially performed using ClustalX [32] and manually adjusted using MEGA5.0 [33]. The maximum-parsimony analyses involved a heuristic search strategy with 1000 replicates of random sequence addition in combination with TBR branch swapping in MEGA5.0. All character states were treated as unordered and equally weighted. Informative insertions and deletions (indels) were coded as binary characters (0, 1) according to Graham et al. (2000). A strict consensus tree was constructed from the most parsimonious trees. Bayesian analyses were conducted using MrBayes version 3.1 [34]. A model of sequence evolution for the combined dataset was selected using the program ModelTest version 3.6 [35] as implemented in MrMTgui [36] and based on the Akaike information criterion (AIC) [37]. The dataset was analyzed as a single partition using the GTR + I + G model. Four chains were run, beginning with a random tree and saving a tree every 100 generations for one million generations. Finally, the ITS region, three cpDNAs and the dataset of the four genes ITS, *rbcL*, *matK* and *trnL*-F were combined for phylogenetic analyses. One sequence from each population was used to construct phylogenetic trees for the genus *Melilotus*.

## Results

### Alignments and DNA sequence data

A total of 96 haplotypes were identified for the ITS region, and 31, 83 and 106 haplotypes were identified for the *rbcL*, *matK*, and *trnL*-F genes, respectively. One sequence from each

**Table 3. Dataset and tree statistics from separate maximum parsimony analyses.**

| Sequence    | Number of sequences | Aligned Length/bp | Conserved site/bp | Variable site /bp | Singleton site/bp | Parsimony informative /bp | Parsimony informative site/% | (G+C) Content /% |
|-------------|---------------------|-------------------|-------------------|-------------------|-------------------|---------------------------|------------------------------|------------------|
| <i>rbcl</i> | 42                  | 755               | 666               | 88                | 27                | 61                        | 8.1                          | 40.8             |
| nrDNA       | 48                  | 714               | 572               | 111               | 42                | 69                        | 9.8                          | 49.0             |
| 3—cpDNA     | 48                  | 2284              | 2058              | 117               | 29                | 88                        | 3.0                          | 35.0             |
| 4-genes     | 48                  | 2998              | 2611              | 236               | 73                | 163                       | 5.4                          | 38.4             |

doi:10.1371/journal.pone.0132596.t003

population was used for constructing phylogenetic trees. Accession numbers of *rbcl*, *matK*, *trnL-F* and ITS respectively are KP987625—KP987627, KP987673—KP987720, KP987577—KP987624 and KP987721—KP987768. The 755-bp fragment of the *rbcl* gene yielded the most parsimonious trees (length = 138 steps; CI = 0.667; RI = 0.928). The nrDNA tree was based on an alignment of 714 bp (length = 159 steps; CI = 0.765; RI = 0.929). The combined dataset of 3 cpDNAs comprised 2284 bp (length = 241 steps; CI = 0.838; RI = 0.916) and the 4-gene dataset 2998 bp, with maximum-parsimony analyses resulting in the most parsimonious trees (length = 252 steps; CI = 0.625; RI = 0.852). The aligned sequence information for the phylogenetic analysis is presented in [Table 3](#).

## Phylogenetic analyses

***rbcl* analysis in the legume family.** The phylogenetic tree in the legume family shown in [Fig 1](#) comprised two large clades, designated A and B. In phylogenetic tree, all the *Melilotus* species formed a monophyletic clade with a high bootstrap value of 100. Among them, the *Melilotus* was divided into two subclades, named clade I and clade II, with bootstrap values of 65 and 50, respectively. In clade II, *M. siculus* and *M. sulcatus* formed one subgroup, named clade IIa, and *M. indicus* and *M. Segetalis* formed another subgroup, named clade IIb. These *Melilotus* species clustering within the same subclade may have closer genetic relationships. All species of genera *Medicago* and *Trifolium* formed a clade named clade III which cluster together with genera *Melilotus* and can be used as outgroups in phylogenetic studies of *Melilotus*. All species of genera *Caragana*, *Lathyrus* and *Vicia* formed a big clade named clade IV, with members of *Lathyrus* and *Vicia* forming a subclade.

**3-cpDNA analysis.** The 3-cpDNA tree of *Melilotus* based on 2284-bp of concatenated plastid sequences (*rbcl*, *matK* and *trnL-F*), with *T. lupinaste* and *M. sativa* as outgroups, is shown in [Fig 2](#). Similar to the *rbcl* tree for the legume family ([Fig 1](#)), the 3-cpDNA tree showed that *Melilotus* species can also be divided into two clades, clade I and clade II, though with low bootstrap support. In clade II, *M. spicatus*, *M. indicus* and *M. segetalis* formed a subclade named clade 1, which was supported by a high bootstrap value of 85; *M. infestus*, *M. siculus* and *M. sulcatus* formed clade 2, with low bootstrap values of 54. Compared with the results of the *rbcl* tree for the legume family, subgroup IIb was found in clade 1.

**nrDNA analysis.** The ITS-based phylogenetic tree of *Melilotus* based on the 714-bp alignment is shown in [Fig 3](#), with *T. lupinaste* and *M. sativa* as outgroups. Two strongly divergent and highly supported clades with bootstrap values of 84 and 76, respectively, are shown in the ITS tree. In contrast to the results in [Fig 2](#), clade A consists of two subclades, clade I and clade 1, with high bootstrap values of 91 and 88. Within clade 1, *M. indicus* and *M. segetalis* form a well-supported subgroup named IIb. As shown in [Fig 3](#), subgroup IIa is evidently within clade

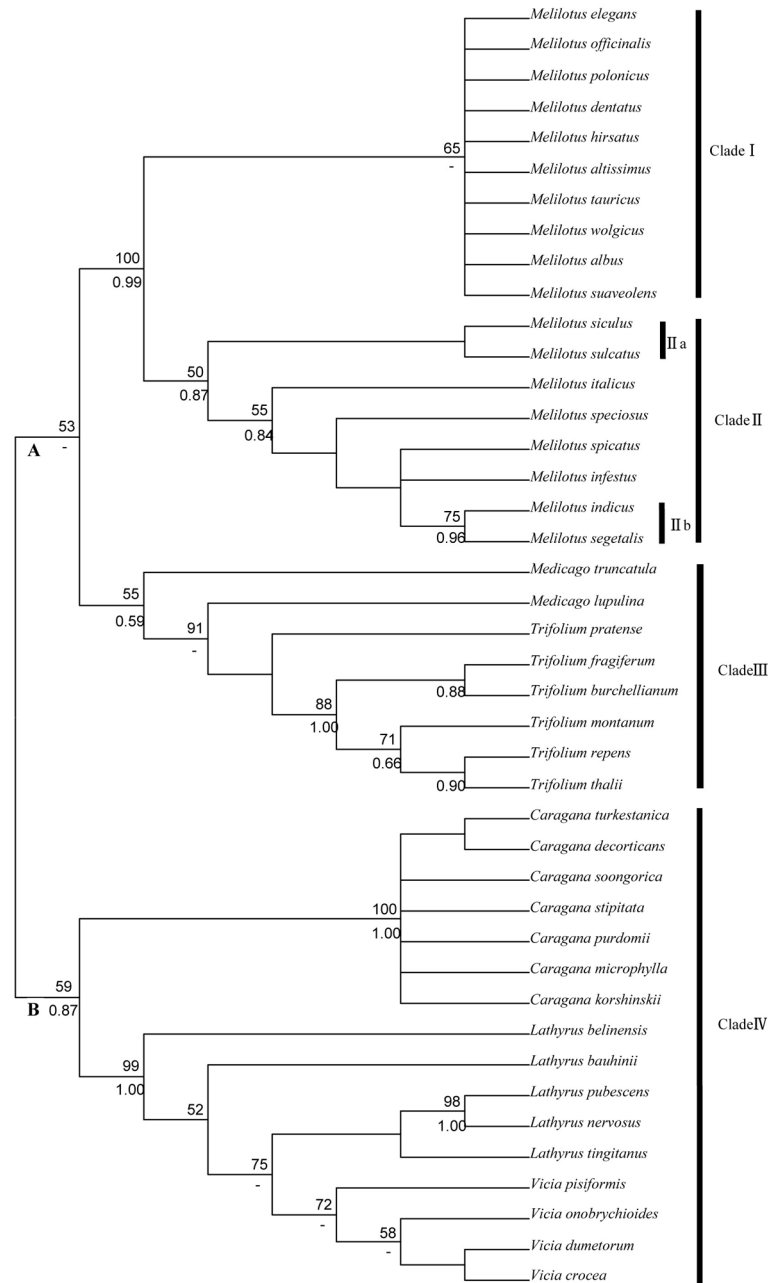

**Fig 1. Topology resulting from maximum parsimony analysis of *rbcL* in the legume family dataset using MEGA5.0.** Bootstrap support values (> 50%) are indicated above the branches (posterior values from the corresponding Bayesian analysis are provided below the branches; -: node not recognized).

doi:10.1371/journal.pone.0132596.g001

2, and subgroup IIa includes two species, *M. sulcatus* and *M. siculus*, with high bootstrap support.

**4-gene analysis.** The 4-gene tree of *Melilotus* yielded 2998 bp of four concatenated genes (*rbcL*, *matK*, *trnL-F* and ITS), with *T. lupinaste* and *M. sativa* as outgroups, is shown in Fig 4. The major clades recovered in the above tree were also successfully resolved by this analysis. Clade I was observed and contained 10 related species. Subgroup IIa and *M. infestus* formed a subclade, namely clade 2, and subgroup IIb with *M. spicatus* formed a highly supported

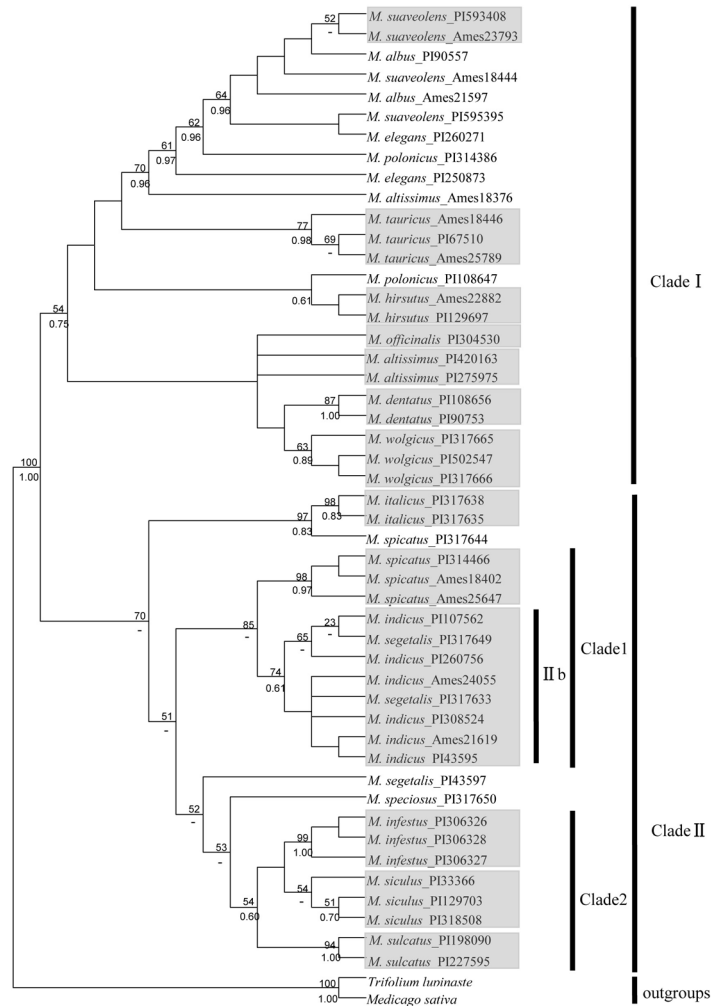

**Fig 2. Topology resulting from maximum parsimony analysis of the combined dataset of 3-cpDNA genes (*rbcl*, *matK*, *trnL-F*) using MEGA5.0.** Bootstrap support values (> 50%) are indicated above the branches (posterior values from the corresponding Bayesian analysis are provided below the branches; -: node not recognized). The populations of the same species clustering together are indicated in a grey box. Except for clade 1 and clade 2, the definitions of clades follow those of Fig 1.

doi:10.1371/journal.pone.0132596.g002

subclade, clade 1. However, clade 2 clustered together with clade I, which is the major difference between this tree and the nrDNA tree. Except for populations of *M. polonicus*, *M. spicatus* and *M. segetalis*, other populations of the same species formed a subclade in the 4-gene tree.

## Discussion

In this study, clade I, which contains 10 species, was found in all four trees of ITS and cpDNA genes. However, in the two cpDNA trees (Fig 1 and Fig 2), the 8 species formed another large clade, clade II. In the nrDNA tree (Fig 3) and 4-gene tree (Fig 4), clade 1, which was clustered into clade II in other two trees, was clustered into clade I; therefore, no clade II was shown. Several species are closely related in 3-cpDNA tree, nrDNA tree and 4-gene tree, e.g., *M. spicatus*, *M. segetalis* and *M. indicus* in clade 1, and *M. siculus*, *M. sulcatus* and *M. infestus* in clade 2. As shown in Table 3, the ITS region provided more informative characteristics (9.8%) than

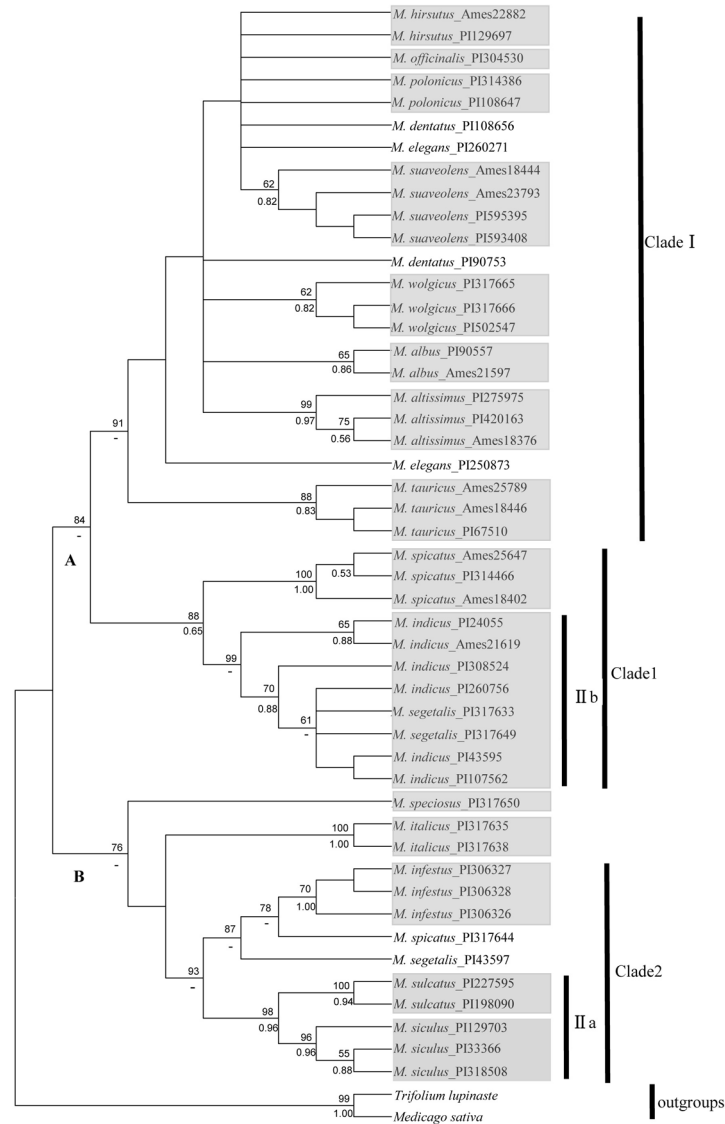

**Fig 3. Topology resulting from maximum parsimony analysis of one ITS dataset using MEGA 5.0.** Bootstrap support values (> 50%) are indicated above the branches (posterior values from the corresponding Bayesian analysis are provided below the branches; -: node not recognized). The populations of the same species clustering together are indicated in a grey box. The definitions of clades follow those of Fig 1 and Fig 2.

doi:10.1371/journal.pone.0132596.g003

cpDNA (3.0%). Liu *et al.* [38] reported a similar result for Ligularia–Cremanthodium–Parasenecio in a study showing that ITS (39.6%) had more parsimony-informative characters than cpDNA (2.5%) using an *NdhF* and *trnL-trnF* combination. The higher sequence variability in the ITS region compared with cpDNA, which has also been demonstrated in many other taxa [39, 40, 41, 42] may lead to incongruence in phylogenetic tree. As nrDNA is biparentally inherited and has high rates of intraspecific gene flow which can enhance species delimitation. However, the maternally inherited chloroplast DNA is more frequently introgressed and more limited use in species delimitation than nuclear DNA [43, 44]. In addition, incomplete lineage sorting [45] and hybridization between and within species [20] may also cause phylogeny incongruent.



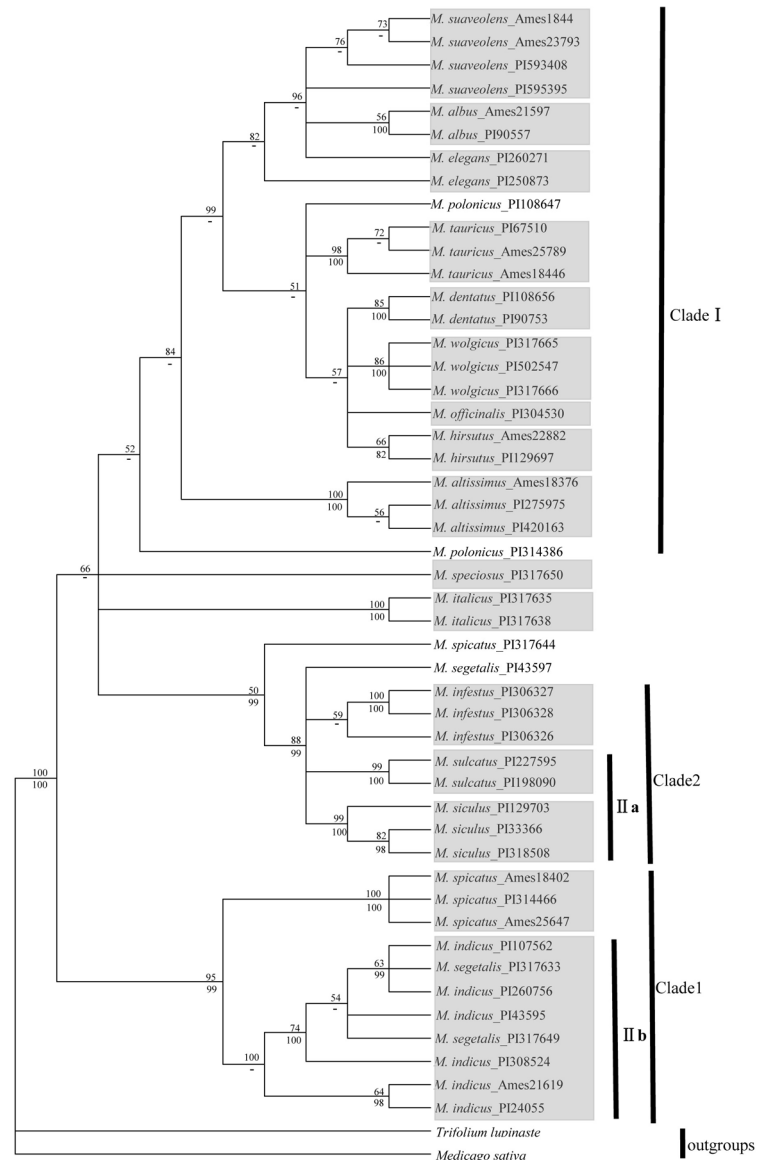

**Fig 4. Topology resulting from maximum parsimony analysis of one 4-gene dataset using MEGA5.0.** Bootstrap support values (> 50%) are indicated above the branches (posterior values from the corresponding Bayesian analysis are provided below the branches; - node not recognized). The populations of the same species clustering together are indicated in a grey box. The definitions of clades follow those of Fig 1 and Fig 2.

doi:10.1371/journal.pone.0132596.g004

According to Steven [16], plant morphology may show great variation within a single plant, which was not used for species classification. Steven studied agronomic and taxonomic reviews of the genus *Melilotus* and divided *Melilotus* into two groups according to flower color, namely, white and yellow. The white group contains four species, *M. albus*, *M. tauricus*, *M. wolgicus* and *M. speciosus*, and the other species compose the yellow group (Table 4). Our results showed that flower color has no obvious link with the phylogenetic classification in our study.

Clarke studied the number and morphology of chromosomes in the genus *Melilotus* [46], reporting a chromosome number of  $2n = 16$ . Karyotype analyses of all *Melilotus* species were

**Table 4. The four classifications of flower color, seed morphology, karyotype and molecular phylogeny in *Melilotus*.**

| Categories          | Classification | Subclassification | Species                                                                                                                                                                                                                                                                                                                             |                                                                                                 |
|---------------------|----------------|-------------------|-------------------------------------------------------------------------------------------------------------------------------------------------------------------------------------------------------------------------------------------------------------------------------------------------------------------------------------|-------------------------------------------------------------------------------------------------|
| Flower color[11]    | white          |                   | <i>M. albus</i> , <i>M. tauricus</i> , <i>M. wolgicus</i> , <i>M. speciosus</i>                                                                                                                                                                                                                                                     |                                                                                                 |
|                     | yellow         |                   | <i>M. altissimus</i> , <i>M. dentatus</i> , <i>M. hirsatus</i> , <i>M. officinalis</i> , <i>M. polonicus</i> , <i>M. suaveolens</i> , <i>M. elegans</i> , <i>M. spicatus</i> <sup>*</sup> , <i>M. indicus</i> , <i>M. segetalis</i> , <i>M. infestus</i> , <i>M. siculus</i> <sup>*</sup> , <i>M. sulcatus</i> , <i>M. italicus</i> |                                                                                                 |
| Karyotype[39, 40]   | Type A         |                   | <i>M. albus</i> , <i>M. altissimus</i> , <i>M. dentatus</i> , <i>M. hirsutus</i> , <i>M. officinalis</i> , <i>M. polonicus</i> , <i>M. suaveolens</i> , <i>M. tauricus</i> , <i>M. wolgicus</i>                                                                                                                                     |                                                                                                 |
|                     | Type B         | B-1               | <i>M. elegans</i> , <i>M. indicus</i> , <i>M. neapolitana</i> <sup>*</sup>                                                                                                                                                                                                                                                          |                                                                                                 |
|                     |                | B-2               | <i>M. infestus</i> , <i>M. macrocarpus</i> , <i>M. messanensis</i> <sup>*</sup> , <i>M. segetalis</i> , <i>M. speciosus</i> , <i>M. sulcatus</i>                                                                                                                                                                                    |                                                                                                 |
|                     | Type C         |                   | <i>M. italicus</i>                                                                                                                                                                                                                                                                                                                  |                                                                                                 |
| Molecular phylogeny | Clade I        |                   | <i>M. albus</i> , <i>M. altissimus</i> , <i>M. dentatus</i> , <i>M. hirsatus</i> , <i>M. officinalis</i> , <i>M. polonicus</i> , <i>M. suaveolens</i> , <i>M. tauricus</i> , <i>M. wolgicus</i> , <i>M. elegans</i>                                                                                                                 |                                                                                                 |
|                     | Clade II       | Clade 1           | <i>M. spicatus</i> <sup>*</sup>                                                                                                                                                                                                                                                                                                     |                                                                                                 |
|                     |                |                   | IIb                                                                                                                                                                                                                                                                                                                                 | <i>M. indicus</i> , <i>M. segetalis</i>                                                         |
|                     |                |                   | Clade 2                                                                                                                                                                                                                                                                                                                             | <i>M. infestus</i>                                                                              |
|                     |                |                   | IIa                                                                                                                                                                                                                                                                                                                                 | <i>M. siculus</i> <sup>*</sup> , <i>M. sulcatus</i><br><i>M. speciosus</i> , <i>M. italicus</i> |

<sup>\*</sup>: Species incongruence in flower color, karyotype and molecular phylogeny

doi:10.1371/journal.pone.0132596.t004

conducted by Kita [47]. The 19 species examined are grouped into three types: A, B and C. Type B is further divided into Type B-1 and Type B-2 (Table 4). The grouping information based on karyotype analyses indicates that the species within each type are closely related [47]. Except for *M. elegans*, clade 1 of the phylogenetic trees is consistent with type A, and clade 2 comprises all Type B and Type C species. The molecular phylogeny classification in our study well support the karyotype classification. The better consistency between molecular phylogenetic and karyotype indicate that karyotype may be the significant phylogenetic signal in the *Melilotus* genus.

However, the phylogeography of *Melilotus* species and populations which rely on their distributions around the world remains largely unknown. Genetic diversity analysis within *Melilotus* genus is on going in our group with SSR markers, which will also provide a supplement conclusion of the interspecific relationship.

## Acknowledgments

This research was supported by grants from Ministry of Agriculture, China (20120304205), Ministry of S&T, China (31101759), and the Department of Agriculture and Animal Husbandry, Gansu Province (GNSW-2011-16).

The authors thank NPGS for providing *Melilotus* seeds, Xue Gao and Peiling Chen for support in cultivating and sampling *Melilotus* species, and Dong Luo and Qiang Zhou for help in data processing. We also thank many other students for their assistance with our study.

## Author Contributions

Conceived and designed the experiments: JZ YW HD. Performed the experiments: HD. Analyzed the data: HD. Contributed reagents/materials/analysis tools: ZD KL DZ FW WL. Wrote the paper: HD.

## References

1. Bowman G, Shirley C, Cramer C (1998) Managing cover crops profitably. Sustainable Agriculture Network Handbook Series 15:100–104.
2. Aboel-Atta AI (2009) Isozymes, RAPD and ISSR variation in *Melilotus indica* (L.) All. and *M. siculus* (Turra) BG Jacks. (Leguminosae). Int J Plant Sci 2: 113–118.
3. Brenner DM (1970) Sweetclover descriptors for GRIN. Newsletter 141: 51–55.
4. Stevenson TM, Kirk LE (1935) Studies in interspecific crossing with *Melilotus*, and intergeneric crossing with *Melilotus*, *Medicago* and *Trigonella*. Sci. Agric. 15: 580–589.
5. Clarke AE (1935) Inheritance of annual habit and mode of pollination in An annual white sweet clover. J. Amer. Soc. Agron 27: 492–496.
6. Conn JS, Werdin-Pfisterer NR, Beattie KL, Densmore RV (2011) Ecology of Invasive *Melilotus albus* on Alaskan Glacial River Floodplains. Arct Antarct Alpres 43: 343–354.
7. Van Rippe LC, Larson DL (2009) Role of invasive *Melilotus officinalis* in two native plant communities. Plant Ecol 200:129–139.
8. Reinhardt AC, Galatowitsch SM (2008). The transition from invasive species control to native species promotion and its dependence on seed density thresholds. Appl Veg Sci 11:131–138.
9. Rogers ME, Colmer TD, Frost K, Henry D, Cornwall D, Hulm, et al. (2008) Diversity in the genus *Melilotus* for tolerance to salinity and water logging. Plant Soil 304: 89–101.
10. Sherif EA (2009) *Melilotus indicus* (L.) All., a salt-tolerant wild leguminous herb with high potential for use as a forage crop in salt-affected soils. Flora-Journal-Elsevier 204: 737–746.
11. Cong JM, Chen FQ, Sun CL (2012) Study on comprehensive development of *Melilotus suaverolens* L. Journal of Anhui Agricultural Sciences 5: 2962–2963.
12. Stickler F, Johnson I (1959) Dry matter and nitrogen production of legumes and legume associations in the fall of the seeding year. Agron J 51: 135–137.
13. Moussavi SM (2001) Species of *Melilotus* in Iran (key to the species, descriptions and their distributions). Rostaniha 2: 57–73.
14. Klebesadel LJ (1954) Morphological, physiological, and winter hardiness comparisons among latitudinal ecotypes of biennial sweetclover (*Melilotus* species) in subarctic Alaska. School of Agriculture and Land Resources Management, Agricultural and Forestry Experiment Station.
15. Isely D (1969) Keys to sweetclovers (*Melilotus*). Proc Iowa Acad Sci 61: 119–131.
16. Stevenson G. A. An agronomic and taxonomic review of the genus *Melilotus* Mill. Can J of Plant Sci 49: 1–20.
17. Fordyce JA, Forister ML, Nice CC, Burns JM, Shapiro AM (2008) Patterns of genetic variation between the checkered skippers *Pyrgus communis* and *Pyrgus albescens* (Lepidoptera: Hesperidae). Ann Entomol Soc Am 101: 794–800.
18. Hao JS, Sun QQ, Zhao HB, Sun XY, Gai YH, Yang Q (2012) The complete mitochondrial genome of *Ctenoptilum vasava* (Lepidoptera: Hesperidae: Pyrginae) and its phylogenetic implication. Comp Funct Genom
19. Doyle JJ (1992) Gene trees and species trees: Molecular systematics as one-character taxonomy. Syst Bot 17: 144–163.
20. Käss E, Wink M (1997) Phylogenetic relationships in the Papilionoideae (family Leguminosae) based on nucleotide sequences of cpDNA (*rbcL*) and ncDNA (ITS 1 and 2). Mol Phylogenet Evol 8: 65–88. PMID: [9242596](#)
21. Arnheim N, Krystal M, Schmickel R, Wilson G, Ryder O, Zimmer E (1980) Molecular evidence for genetic exchanges among ribosomal genes on non-homologous chromosomes in man and apes. Proc Natl Acad Sci 77: 7323–7327. PMID: [6261251](#)
22. Zimmer EA, Martin SL, Beverley SM, Kan YW, Wilson AC (1991) Rapid duplication and loss of genes coding for the a chains of hemoglobin. Proc Natl Acad Sci 77: 2158–2162.
23. Hillis DM, Dixon MT (1991) Ribosomal DNA: Molecular evolution and phylogenetic inference. Quart Rev Biol 66: 411–453. PMID: [1784710](#)
24. Lindner DL, Banik MT (2011) Intragenomic variation in the ITS rDNA region obscures phylogenetic relationships and inflates estimates of operational taxonomic units in genus *Laetiporus*. Mycologia 103: 731–740. doi: [10.3852/10-331](#) PMID: [21289107](#)
25. Scarcelli N, Barnaud A, Eiserhardt W, Treier UA, Seveno M, Anfray A, et al. (2011) A set of 100 chloroplast DNA primer pairs to study population genetics and phylogeny in monocotyledons. Plos One 6, e19954. doi: [10.1371/journal.pone.0019954](#) PMID: [21637837](#)

26. Hamby RK, Zimmer EA (1992) Ribosomal RNA as a phylogenetic tool in plant systematics. *Molecular Systematics of Plants* 12: 50–91.
27. Zhang W, Kan SL, Zhao H, Li ZY, Wang XQ (2014) Molecular phylogeny of Tribe Theeae (Theaceae s. s.) and its implications for generic delimitation. *Plos One* 9: e98133. doi: [10.1371/journal.pone.0098133](https://doi.org/10.1371/journal.pone.0098133) PMID: [24848365](https://pubmed.ncbi.nlm.nih.gov/24848365/)
28. Cardoso D, Queiroz LP, Lima HC, Sukanuma E, Berg CV, Lavin M (2013) A molecular phylogeny of the vataireoid legumes underscores floral evolvability that is general to many early branching papilionoid lineages. *Am J Bot* 100: 403–421. doi: [10.3732/ajb.1200276](https://doi.org/10.3732/ajb.1200276) PMID: [23378491](https://pubmed.ncbi.nlm.nih.gov/23378491/)
29. Lee CS, Yeau SH, Lee NS (2012) Taxonomic status and genetic variation of Korean endemic plants, *Eranthis byunsanensis* and *Eranthis pungdoensis* (Ranunculaceae) based on nrDNA ITS and cpDNA sequences. *J Plant Biol* 55: 165–177.
30. Jenks AA, Walker JB, Kim SC (2013) Phylogeny of new world *Salvia* subgenus *Calosphace* (Lamiaceae) based on cpDNA (*psbA-trnH*) and nrDNA (ITS) sequence data. *J Plant Res* 126: 483–496. doi: [10.1007/s10265-012-0543-1](https://doi.org/10.1007/s10265-012-0543-1) PMID: [23263465](https://pubmed.ncbi.nlm.nih.gov/23263465/)
31. Shan Z (2011) Improved SDS method for general plant genomic DNA extraction. *Guangdong Agricultural Sciences* 8: 113–115.
32. Larkin MA, Blackshields G, Brown NP, Chenna R, McGettigan PA (2007) Clustal W and Clustal X version 2.0. *Bioinformatics* 23: 2947–2948. PMID: [17846036](https://pubmed.ncbi.nlm.nih.gov/17846036/)
33. Tamura K, Peterson D, Peterson N, Stecher G, Nei M, Kumar S (2011) MEGA5: molecular evolutionary genetics analysis using maximum likelihood, evolutionary distance, and maximum parsimony methods. *Mol Biol and Evol* 28: 2731–2739.
34. Huelsenbeck JP, Ronquist F (2001) MRBAYES: Bayesian inference of phylogenetic trees. *Bioinformatics* 17: 754–755. PMID: [11524383](https://pubmed.ncbi.nlm.nih.gov/11524383/)
35. Posada D, Crandall KA (1998) Modeltest: testing the model of DNA substitution. *Bioinformatics* 14: 817–818. PMID: [9918953](https://pubmed.ncbi.nlm.nih.gov/9918953/)
36. Nuin P (2005) MrMTgui 1.0 (version 1.6). Program distributed by the author.
37. Posada D, Buckley T (2004) Model selection and model averaging in phylogenetics: advantages of Akaike Information Criterion and Bayesian approaches over likelihood ratio tests. *Syst Biol* 53: 793–808. PMID: [15545256](https://pubmed.ncbi.nlm.nih.gov/15545256/)
38. Liu JQ, Wang TJ, Wang AL, Ohba H, Abbott RJ (2006) Radiation and diversification within the Ligu-laria–Cremanthodium–Parasenecio complex (Asteraceae) triggered by uplift of the Qinghai-Tibetan Plateau. *Mol Phylogenet Evol* 38: 31–49. PMID: [16290033](https://pubmed.ncbi.nlm.nih.gov/16290033/)
39. Clevinger JA, Panero JL (2000) Phylogenetic analysis of Silphium and subtribe Engelmanniinae (Asteraceae: Heliantheae) based on ITS and ETS sequence data. *Am J Bot* 87: 565–572. PMID: [10766728](https://pubmed.ncbi.nlm.nih.gov/10766728/)
40. Linder CR, Goertzen LR, Heuval BV, Francisco-Ortega J, Jansen RK (2000) The complete external transcribed spacer of 18S-26S rDNA: amplification and phylogenetic utility at low taxonomic levels in Asteraceae and closely allied families. *Mol Phylogenet Evo* 14: 285–303.
41. Fior S, Karis PO, Casazza G, Minuto L, Sala F (2006) Molecular phylogeny of the Caryophyllaceae (Caryophyllales) inferred from chloroplast *matK* and nuclear rDNA ITS sequences. *Am J Bo.* 93: 399–411.
42. Mitsui Y, Chen ST, Zhou ZK, Peng CI, Deng YF, Setoguchi H (2008) Phylogeny and biogeography of the genus *Ainsliaea* (Asteraceae) in the Sino-Japanese Region based on nuclear rDNA and cpDNA sequence data. *Ann Bot-london* 101: 111–124.
43. Degnan JH, Rosenberg NA (2009) Gene tree discordance, phylogenetic inference and the multispecies coalescent. *Trends Ecol Evol* 24: 332–340. doi: [10.1016/j.tree.2009.01.009](https://doi.org/10.1016/j.tree.2009.01.009) PMID: [19307040](https://pubmed.ncbi.nlm.nih.gov/19307040/)
44. Maddison WP (1997) Gene trees in species trees. *Syst Biol* 46: 523–536.
45. Maddison WP, Knowles LL (2006) Inferring phylogeny despite incomplete lineage sorting. *Syst Biol* 55: 21–30. PMID: [16507521](https://pubmed.ncbi.nlm.nih.gov/16507521/)
46. Clarke AE (1934) The number and morphology of chromosomes in the genus *Melilotus*. University of California Press.
47. Kita F (1965) Studies on the genus *Melilotus* (sweetclover) with special reference to interrelationships among species from a cytological point of view. *J Fac Agr* 54: 23–122.
48. Dong WP, Cheng T, Li CH, Xu C, Long P, Chen CM, et al. (2013) Discriminating plants using the DNA barcode *rbcLb*: an appraisal based on a large data set. *Mol Ecol Resour* 14: 336–343. doi: [10.1111/1755-0998.12185](https://doi.org/10.1111/1755-0998.12185) PMID: [24119263](https://pubmed.ncbi.nlm.nih.gov/24119263/)
49. Yu J, Xue JH, Zhou SL (2011) New universal *matK* primers for DNA barcoding angiosperms. *J Syst Evol* 49: 176–181.
50. Taberlet P, Gielly L, Pautou G, Bouvet J (1991) Universal primers for amplification of three noncoding regions of chloroplast DNA. *Plant Mol Biol* 17: 1105–1109. PMID: [1932684](https://pubmed.ncbi.nlm.nih.gov/1932684/)
